# Supplementary material for: Restoration of mGluR6 Localization Following AAV-Mediated Delivery in a Mouse Model of Congenital Stationary Night Blindness
Source: PubMed Central journal article supplement (PMC7980044; doi:10.1167/iovs.62.3.24), 2021-03-17
Supplement: iovs-62-3-24_s001.pdf [file iovs-62-3-24_s001.pdf]

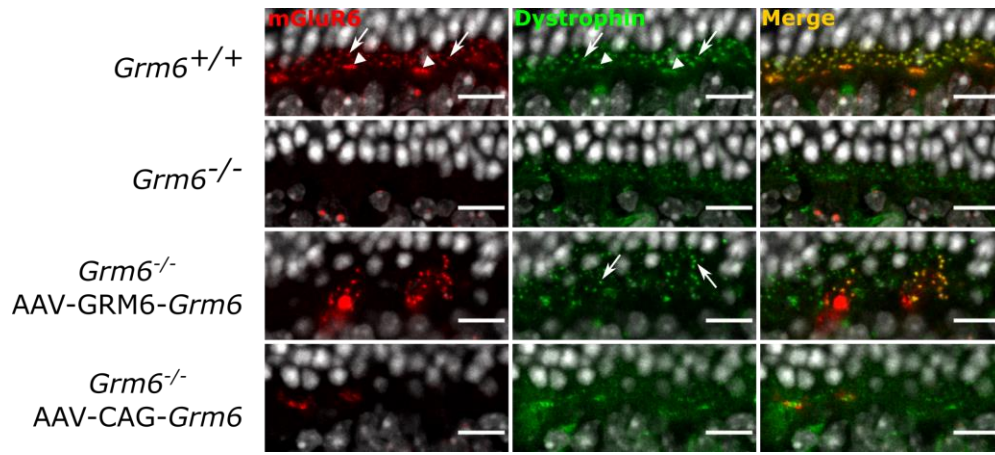

Supplementary data 1: Localization of dystrophin after treatment

Representative confocal images of cross-sections centered on the OPL of *Grm6*<sup>+/+</sup>, untreated *Grm6*<sup>-/-</sup>, *Grm6*<sup>-/-</sup>-GRM6-*Grm6* and *Grm6*<sup>-/-</sup>-CAG-*Grm6* retinas co-stained (yellow, merge) with an antibody against mGluR6 (red) and against dystrophin (green). The presumed rod-to-BC and the cone-to-cone BCs synapses are highlighted with an arrow and arrow head, respectively. Scale bar, 10  $\mu$ m.
